# Supplementary material for: Experimental Design and Bioassays as Tools to Investigate the Impact of Anodic Oxidation on Progestins Degradation
Source: MDPI journal article supplement (doi:10.3390/w15010061), 2022-12-24
Supplement: s1 [file s1]

# Experimental Design and Bioassays as Tools to Investigate the Impact of Anodic Oxidation on Progestins Degradation

## 1. Supplementary figures

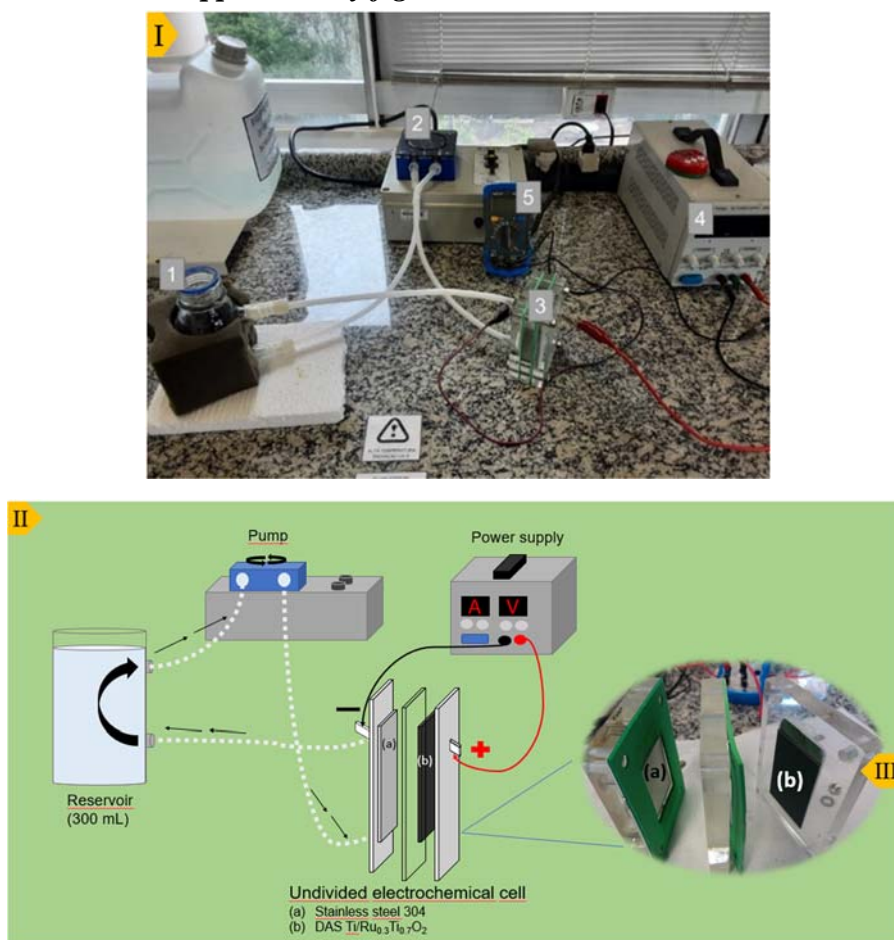

**Figure S1** – (I) Electrochemical apparatus used for the degradation of progestogens via anodic oxidation: (1) reservoir; (2) peristaltic pump; (3) electrochemical cell; (4) power supply; (5) multimeter. (II) Schematic representation of the electrochemical apparatus. (III) Disassembled electrochemical cell.

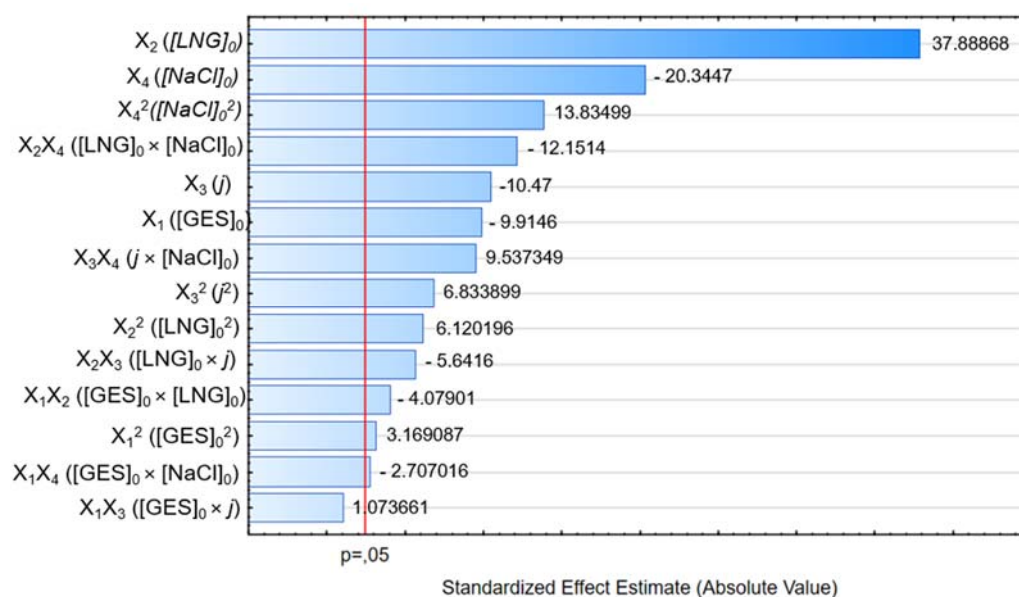

**Figure S2** – Pareto chart of standardized effects.

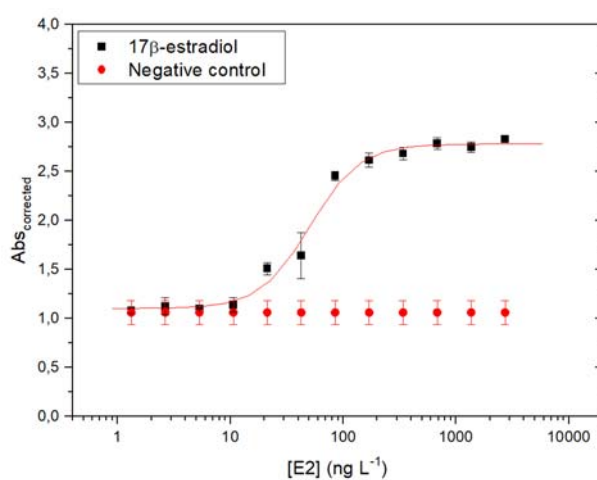

**Figure S3** – Dose-response curve for the positive control E2 (acetonitrile: water of 55:45 v/v. LOD = 2.3 ng L<sup>-1</sup> and LOQ = 7.0 ng L<sup>-1</sup>).

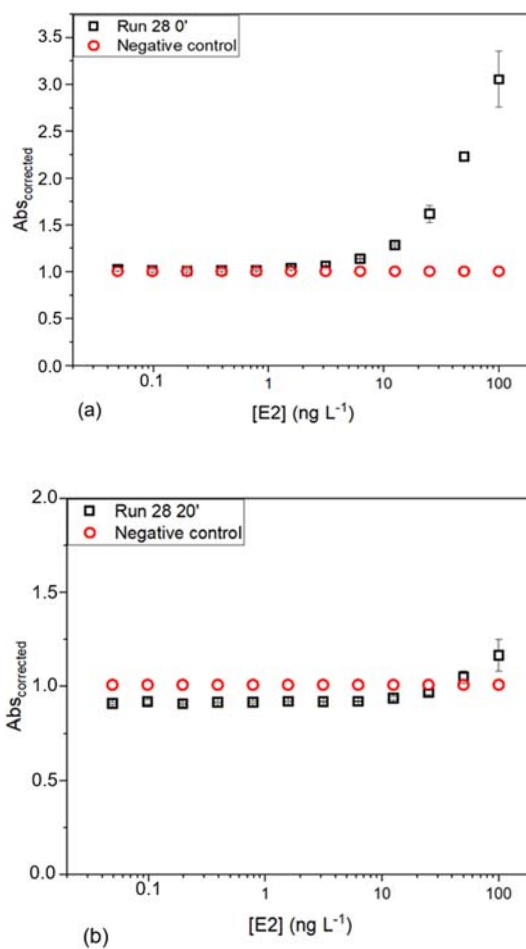

**Figure S4** – Dose-response curve for experiment 28 before (a) and after (b) the anodic oxidation process ( $[\text{NaCl}]_0 = 0.07 \text{ mol L}^{-1}$ ,  $j = 32.5 \text{ mA cm}^{-2}$ ,  $[\text{LNG}]_0 = [\text{GES}]_0 = 1.0 \text{ mg L}^{-1}$ ).

## 2. Supplementary tables

**Table S1** – Physical and chemical properties of progestins under study.

| Progestins     | Chemical structure | Molar weight (g mol <sup>-1</sup> ) | Water solubility (25 °C) (mg L <sup>-1</sup> ) | UV <sub>maximum</sub> (nm) | pK <sub>ow</sub> <sup>a</sup> | pK <sub>a1</sub> |
|----------------|--------------------|-------------------------------------|------------------------------------------------|----------------------------|-------------------------------|------------------|
| Levonorgestrel |                    | 312.4                               | 2.05                                           | 241                        | 3.48                          | 17.91            |
| Gestodene      |                    | 310.4                               | 8.12                                           | 244                        | 3.26                          | 17.08            |

<sup>a</sup>Octanol-water partition coefficients at 20 °C.

**Table S2** – Validation parameters of the LNG and GES calibration curves obtained by UFLC analysis. LOD: limit of detection; LOQ: limit of quantification; RSD: relative standard deviation; CI: confidence interval.

| Progestin | LOD<br>(mg L <sup>-1</sup> ) | LOQ<br>(mg L <sup>-1</sup> ) | R <sup>2</sup> | Recovery (%) | RSD* (%) | CI**        |
|-----------|------------------------------|------------------------------|----------------|--------------|----------|-------------|
| LNG       | 0.02                         | 0.07                         | 0.9991         | 91.60 ± 0.04 | 24.0     | 0.33 ± 0.10 |
| GES       | 0.06                         | 0.20                         | 0.9980         | 84.90 ± 2.47 | 33.0     | 1.40 ± 0.06 |

\* The relative standard deviation (RSD) corresponds to the quotient between the standard deviation (*s*) and the mean value ( $\bar{x}$ ) of *n* = 30 independent measurements (replicates) of LNG and GES concentrations in solution, multiplied by 100. \*\* The confidence interval for the mean is given by  $CI = \bar{x} \pm t_{n-1} \frac{s}{\sqrt{n}}$ , where  $t_{n-1}$  corresponds to the critical value of Student's *t* distribution with *n*-1 degrees of freedom and 95% confidence level (Ribani, M.; Bottoli, C. B. G.; Collins, C. H.; Jardim, I. C. S. F.; Melo, L. F. C. Validação em Métodos Cromatográficos e Eletroforéticos. *Quimica Nova* 2004, 27, 771–780, doi: 10.1590/S0100-40422004000500017).
